# Supplementary material for: Genome sequence of Desulfobacterium autotrophicum HRM2, a marine sulfate reducer oxidizing organic carbon completely to carbon dioxide
Source: PubMed Central journal article supplement (PMC2702500; doi:10.1111/j.1462-2920.2008.01825.x), 2009-05
Supplement: emi0011-1038-SD1.pdf [file emi0011-1038-SD1.pdf]

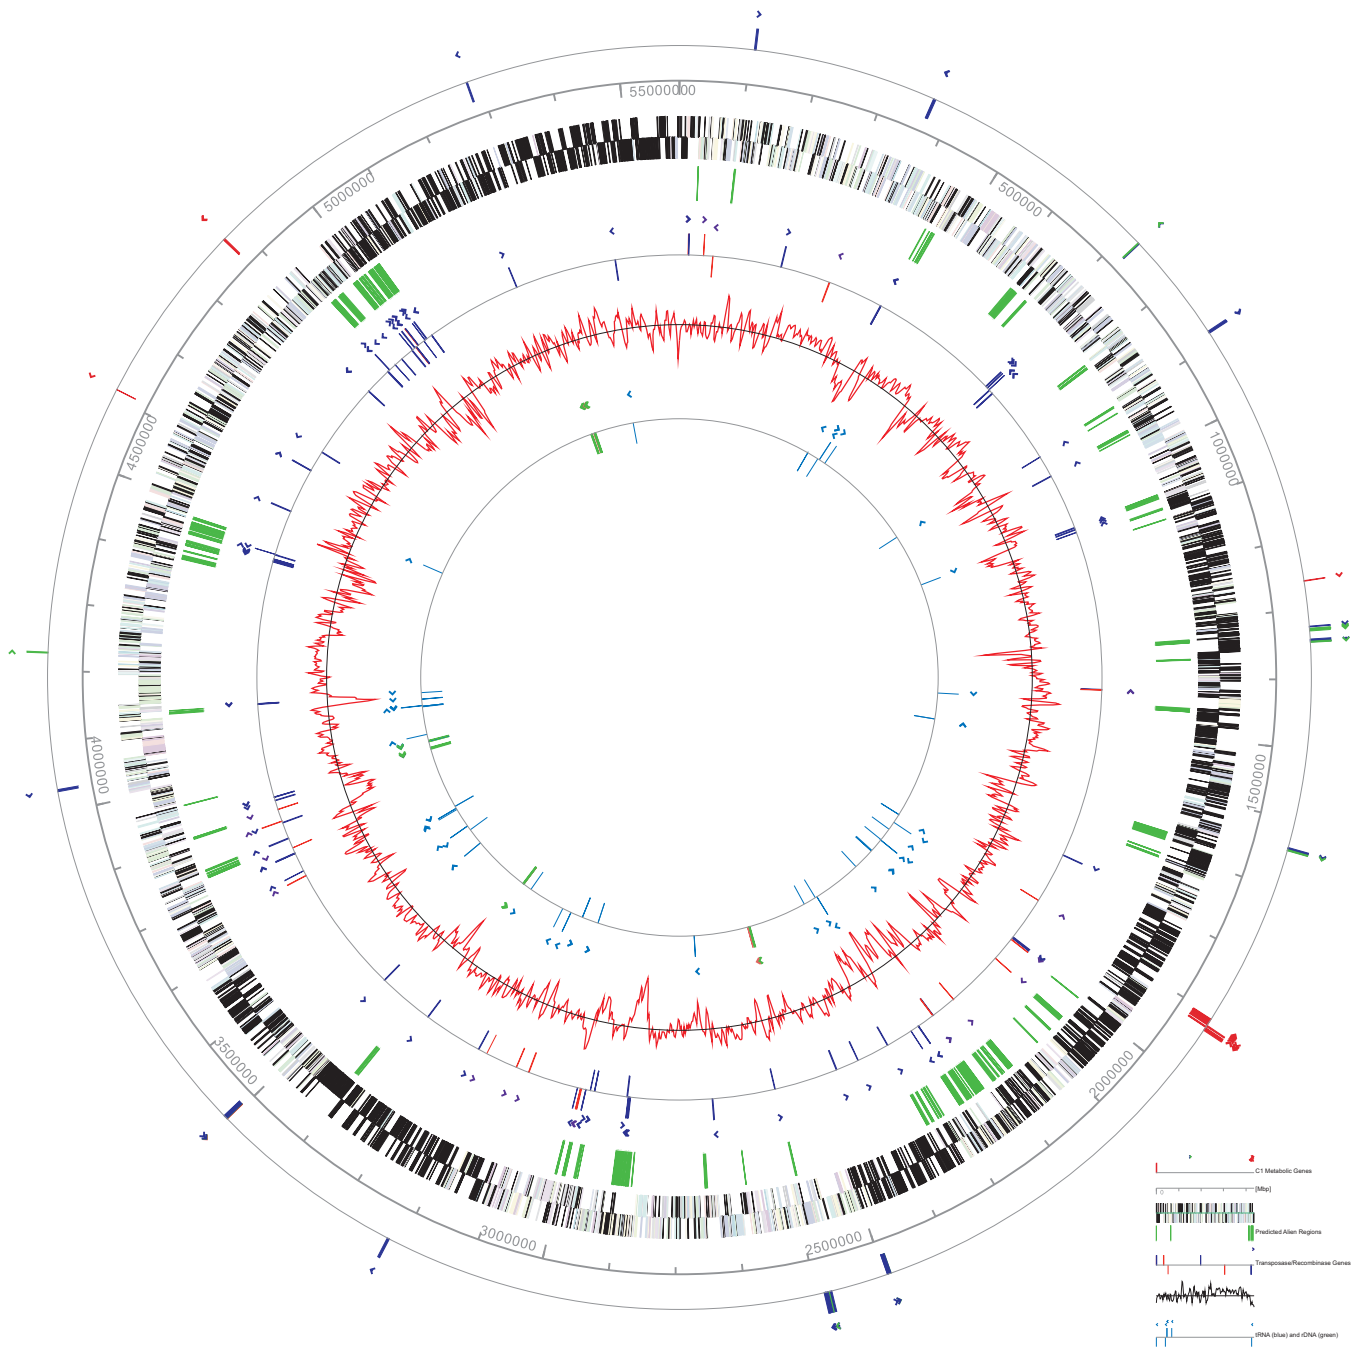

Figure S1
